# Supplementary material for: Targeting oncogenic KRasG13C with nucleotide-based covalent inhibitors
Source: eLife. 2023 Mar 27;12:e82184. doi: 10.7554/eLife.82184 (PMC10042540; doi:10.7554/eLife.82184)
Supplement: Source data 1. [file elife-82184-data1.xlsx]

## Sheet: KRasWT
WB_KRasWT					Figure 3; Figure 3-figure supplement 6; Figure 3-figure supplement 7
	Cell lysate 1									Cell lysate 2									Cell lysate 3										KRasWT
	control	50 µg	100 µg	200 µg	300 µg					control	50 µg	100 µg	200 µg	300 µg					control	50 µg	100 µg	200 µg	300 µg				lane	Amount (µg)	KRas		pcRaf		tAkt		pAkt		tErk		pErk		pS6
KRas	1	3.29	5.43	12.5	19.5				KRas	1	1.91	4.27	6.46	14.2				KRas	1	6.15	24.7	45.1	48.8				1	control	1	0	1	0	1	0	1	0	1	0	1	0	1	0
pcRaf	1	0.804	0.725	0.682	0.737				pcRaf	1	1.26	1.13	1.17	1.28				pcRaf	1	0.901	0.944	0.807	0.945				2	50 µg	3.78333	1.76577	0.988333	0.196137	1.29	0.167531	0.896133	0.687418	1.13167	0.263444	1.06533	0.0548047	0.992333	0.027158
tAkt	1	1.49	2.02	2.21	3.26				tAkt	1	1.08	0.884	0.517	0.764				tAkt	1	1.3	1.26	1.56	1.99				3	100 µg	11.4667	9.36936	0.933	0.165523	1.388	0.472519	0.828	0.581943	0.994667	0.0712991	1.25667	0.174611	1.01167	0.338647
pAkt	1	1.73	1.53	2.61	1.5				pAkt	1	0.912	0.849	0.692	0.83				pAkt	1	0.0464	0.105	0.436	0.221				4	200 µg	21.3533	16.9715	0.886333	0.206972	1.429	0.697344	1.246	0.97014	0.932333	0.0909591	1.5	0.34215	0.991667	0.350204
tErk	1	0.899	0.894	0.956	1.03				tErk	1	0.996	1.05	1.03	1.13				tErk	1	1.5	1.04	0.811	1.07				5	300 µg	27.5	15.216	0.987333	0.223691	2.00467	1.01904	0.850333	0.522347	1.07667	0.0410961	1.42333	0.26837	0.866	0.0500067
pErk	1	0.996	1.37	1.6	1.72				pErk	1	1.13	1.01	1.04	1.07				pErk	1	1.07	1.39	1.86	1.48
pS6	1	0.967	0.752	0.819	0.811				pS6	1	0.98	0.793	0.676	0.855				pS6	1	1.03	1.49	1.48	0.932

## Sheet: KRasG13C
WB_KRasG13C					Figure 3; Figure 3-figure supplement 6; Figure 3-figure supplement 7
	Cell lysate 1									Cell lysate 2									Cell lysate 3										KRasG13C
	control	50 µg	100 µg	200 µg	300 µg					control	50 µg	100 µg	200 µg	300 µg					control	50 µg	100 µg	200 µg	300 µg				lane	Amount (µg)	KRas		pcRaf		tAkt		pAkt		tErk		pErk		pS6
KRas	1	10.1	16.6	37.9	53.6				KRas	1	12.2	17.6	21.6	30.5				KRas	1	2.79	4.1	13.4	20.8				1	control	1	0	1	0	1	0	1	0	1	0	1	0	1	0
pcRaf	1	1.43	1.55	1.46	1.29				pcRaf	1	2.59	4.23	6.14	6.29				pcRaf	1	1.91	1.55	1.74	1.5				2	50 µg	8.36333	4.03312	1.97667	0.475908	1.521	0.428122	1.70333	0.404502	0.972667	0.0723387	3.62333	1.52827	1.37	0.176824
tAkt	1	1.94	2.66	2.05	1.78				tAkt	1	0.933	0.738	1.29	1.44				tAkt	1	1.69	1.08	1.44	1.65				3	100 µg	12.7667	6.14184	2.44333	1.26336	1.49267	0.837154	2.65333	0.721542	0.826333	0.271652	4.21667	1.41658	1.32033	0.355275
pAkt	1	1.68	3.58	4.98	4.64				pAkt	1	1.22	2.56	2.01	3.64				pAkt	1	2.21	1.82	1.89	1.72				4	200 µg	24.3	10.1827	3.11333	2.14323	1.59333	0.328667	2.96	1.4292	0.814	0.230084	4.88333	1.44412	1.48333	0.522834
tErk	1	0.876	0.443	0.502	0.97				tErk	1	1.05	1.04	1.05	1.08				tErk	1	0.992	0.996	0.89	0.886				5	300 µg	34.9667	13.758	3.02667	2.30912	1.62333	0.140079	3.33333	1.21165	0.978667	0.0794369	6.30333	2.07307	1.7	0.515623
pErk	1	5.54	6.18	6.87	9.07				pErk	1	1.8	2.89	3.48	4.08				pErk	1	3.53	3.58	4.3	5.76
pS6	1	1.14	0.951	1.17	1.44				pS6	1	1.57	1.8	2.22	2.42				pS6	1	1.4	1.21	1.06	1.24

## Sheet: KRasG13CedaGDP
WB_KRasG13CedaGDP					Figure 3; Figure 3-figure supplement 6; Figure 3-figure supplement 7
	Cell lysate 1									Cell lysate 2									Cell lysate 3										KRasG13CedaGDP
	control	50 µg	100 µg	200 µg	300 µg					control	50 µg	100 µg	200 µg	300 µg					control	50 µg	100 µg	200 µg	300 µg				lane	Amount (µg)	KRas		pcRaf		tAkt		pAkt		tErk		pErk		pS6
KRas	1	3.66	7.36	15	14				KRas	1	7	10.2	18.1	33.8				KRas	1	3.42	10	17.6	27.1				1	control	1	0	1	0	1	0	1	0	1	0	1	0	1	0
pcRaf	1	0.746	0.89	0.737	0.565				pcRaf	1	1.33	0.778	0.884	0.97				pcRaf	1	0.841	1.4	1.21	1.13				2	50 µg	4.69333	1.634	0.972333	0.255865	0.981	0.242092	0.541333	0.744051	1.18633	0.636913	0.773333	0.0523726	0.955667	0.251006
tAkt	1	0.653	0.924	1.06	0.917				tAkt	1	1.23	1.65	1.22	0.965				tAkt	1	1.06	0.973	0.775	0.683				3	100 µg	9.18667	1.29423	1.02267	0.270704	1.18233	0.331295	0.656667	0.300731	1.18233	0.482249	0.909667	0.139839	0.931333	0.155618
pAkt	1	0.886	0.275	0.453	0.632				pAkt	1	1.23	0.685	0.949	0.965				pAkt	1	-0.492	1.01	0.563	1.17				4	200 µg	16.9	1.35892	0.943667	0.197657	1.01833	0.184044	0.655	0.212684	1.207	0.420529	1.34133	0.53267	1.04533	0.144926
tErk	1	0.837	0.91	1.12	1.26				tErk	1	2.08	1.86	1.76	1.23				tErk	1	0.642	0.777	0.741	0.719				5	300 µg	24.9667	8.22287	0.888333	0.237779	0.855	0.123191	0.922333	0.2217	1.06967	0.248261	1.60533	0.622428	0.906333	0.102769
pErk	1	0.819	1.1	2.08	2.38				pErk	1	0.7	0.768	0.844	0.856				pErk	1	0.801	0.861	1.1	1.58
pS6	1	0.797	0.914	1.23	0.978				pS6	1	1.31	1.13	1.03	0.98				pS6	1	0.76	0.75	0.876	0.761

## Sheet: KRasG13CacetyledaGDP
WB_KRasG13CacetyledaGDP					Figure 3-figure supplement 8
	Cell lysate 1									Cell lysate 2									Cell lysate 3										KRasG13CacetyledaGDP
	control	50 µg	100 µg	200 µg	300 µg					control	50 µg	100 µg	200 µg	300 µg					control	50 µg	100 µg	200 µg	300 µg				lane	Amount (µg)	KRas		pcRaf		tAkt		pAkt		tErk		pErk		pS6
KRas	1	1.86	3.77	13.2	25.2				KRas	1	3.06	6.87	34.6	50.9				KRas	1	2.7	3.59	13.2	19.7				1	control	1	0	1	0	1	0	1	0	1	0	1	0	1	0
pcRaf	1	8.73	8.39	13.7	10.1				pcRaf	1	1.1	1.51	2.17	3.88				pcRaf	1	15.7	22.7	32.4	30.3				2	50 µg	2.54	0.502792	8.51	5.96245	1.622	0.617442	2.19633	1.07423	0.92	0.0323213	8.04667	4.64455	3.37667	1.55006
tAkt	1	0.916	1.23	1.36	0.81				tAkt	1	2.42	2.03	3.63	4.18				tAkt	1	1.53	1.95	1.8	2.17				3	100 µg	4.74333	1.50557	10.8667	8.82627	1.73667	0.359753	3.08333	1.62904	0.821667	0.108251	9.69667	5.23817	4.32333	2.48516
pAkt	1	0.679	0.79	1.19	2.16				pAkt	1	2.89	4.04	9.05	13.3				pAkt	1	3.02	4.42	6.2	3.81				4	200 µg	20.3333	10.0881	16.09	12.4565	2.26333	0.982932	5.48	3.24897	0.899333	0.0746964	15.2167	5.35636	6.60667	2.41784
tErk	1	0.879	0.675	0.796	0.616				tErk	1	0.958	0.933	0.932	0.898				tErk	1	0.923	0.857	0.97	1.12				5	300 µg	31.9333	13.5981	14.76	11.278	2.38667	1.3843	6.42333	4.90897	0.878	0.206243	18.8667	7.86822	6.45667	2.66459
pErk	1	3.76	5.77	14	17				pErk	1	14.5	17.1	22.3	29.3				pErk	1	5.88	6.22	9.35	10.3
pS6	1	1.2	1.62	3.38	2.82				pS6	1	4.69	7.62	9.2	9.13				pS6	1	4.24	3.73	7.24	7.42

## Sheet: KRasG13CedaGppCp
WB_KRasG13CedaGppCp					Figure 3-figure supplement 9
	Cell lysate 1									Cell lysate 2																			KRasG13CedaGppCp
	control	50 µg	100 µg	200 µg	300 µg					control	50 µg	100 µg	200 µg	300 µg													lane	Amount (µg)	KRas		pcRaf		tAkt		pAkt		tErk		pErk		pS6
KRas	1	2.7	22.5	18.2	32				KRas	1	3.63	7.1	8.84	13													1	control	1	0	1	0	1	0	1	0	1	0	1	0	1	0
pcRaf	1	2.67	2.6	2.93	3.66				pcRaf	1	1.69	2.1	3.37	3.19													2	50 µg	3.165	0.465	2.18	0.49	1.44	0.09	2.62	0.51	1.115	0.005	4.94	0.22	3.355	0.845
tAkt	1	1.35	1.3	1.09	0.939				tAkt	1	1.53	1.69	1.67	1.47													3	100 µg	14.8	7.7	2.35	0.25	1.495	0.195	5.59	0.71	1.215	0.075	6.09	1.79	2.815	0.005
pAkt	1	2.11	4.88	6.55	6.53				pAkt	1	3.13	6.3	7.78	5.2													4	200 µg	13.52	4.68	3.15	0.22	1.38	0.29	7.165	0.615	1.19	0.02	6.26	0.99	3.215	0.065
tErk	1	1.12	1.29	1.21	1.69				tErk	1	1.11	1.14	1.17	1.5													5	300 µg	22.5	9.5	3.425	0.235	1.2045	0.2655	5.865	0.665	1.595	0.095	6.73	0.89	3.51	0.1
pErk	1	4.72	7.88	7.25	7.62				pErk	1	5.16	4.3	5.27	5.84
pS6	1	4.2	2.82	3.15	3.41				pS6	1	2.51	2.81	3.28	3.61
