# Supplementary material for: Targeting oncogenic KRasG13C with nucleotide-based covalent inhibitors
Source: eLife journal article supplement (doi:10.7554/elife.82184), 2023-03-09
Supplement: table1-data2 [file Table 1-source data 2.docx]

**Table 1-source data 2:** kon calculation. Overview of kon rate constants obtained from competitive binding experiments with mantdGDP (Table 1-source data 1).

|  | **nucleotide** | | **eda** | **pda** | **bda** |
| --- | --- | --- | --- | --- | --- |
| **kon**  **[µM-1s-1]** | **GDP** | 4.22 | 3.73 | 3.34 | 3.12 |
| **GTP** | 5.23 | 4.39 | 3.36 | 4.21 |
| **dGTP** | - | 4.51 | 4.38 | 4.06 |
