# Supplementary material for: Targeting oncogenic KRasG13C with nucleotide-based covalent inhibitors
Source: eLife journal article supplement (doi:10.7554/elife.82184), 2023-03-09
Supplement: table1-data4 [file elife-82184-table1-data4-v1.zip]

**Table 1-source data 4.** KD calculations. Overview of the calculated KD values of pdaGDP and edaGDP obtained from an HPLC-based approach (Table 1-source data 3); For reference, the KD values of GDP and the nucleotide analogue SML-8-73-1 are also listed.

|  | **nucleotide** | **-EDTA** | **+EDTA** | **+SOS** |
| --- | --- | --- | --- | --- |
| **KD**  **[pM]** | **GDP** | 2.5 | | |
| **pdaGDP** | 8.0 | 7.4 | 10.4 |
| **bdaGDP** | 10.0 | 8.9 | 10.0 |
| **SML-8-73-1** | ~ 140 nM | | |
